# Supplementary material for: Planar cell polarity genes control the connectivity of enteric neurons
Source: JCI journal article supplement (doi:10.1172/jci66759), 2013-03-08
Supplement: sd1 [file 1]

301 Moved Permanently

# Moved Permanently

The document has moved here.
